# Supplementary material for: Undelaminated multilayer MXenes for block thermoelectric generators
Source: Royal Society of Chemistry journal article supplement (doi:10.1039/d4ta01940g), 2024-01-01
Supplement: d4ta01940g1.pdf [file d4ta01940g1.pdf]

## Undelaminated multilayer MXenes for block thermoelectric generator

Zhangli Du<sup>a, b, †</sup>, Kaipeng Deng<sup>a, †</sup>, Feng Wang<sup>c</sup>, Xusheng Liu<sup>d</sup>, Binbin Jiang<sup>d</sup>, Tao Zhao<sup>b, d</sup>,  
Wenke Xie<sup>c\*</sup>, Xu Xiao<sup>a, b\*</sup>, Tianpeng Ding<sup>a, b\*</sup>

<sup>a</sup>Yangtze Delta Region Institute (Huzhou), University of Electronic Science and Technology of China, Huzhou, Zhejiang 313001, China.

<sup>b</sup>School of Physics, University of Electronic Science and Technology of China, Chengdu, Sichuan 611731, China.

<sup>c</sup>School of Electronic Science and Engineering, University of Electronic Science and Technology of China, Chengdu, Sichuan 611731, China.

<sup>d</sup>Shenzhen Institute for Advanced Study, University of Electronic Science and Technology of China, Shenzhen 518110, China.

<sup>†</sup>These authors contributed equally.

\*Correspondence and requests for materials should be addressed to: wk\_xie@uestc.edu.cn; xuxiao@uestc.edu.cn; dingtp@uestc.edu.cn.

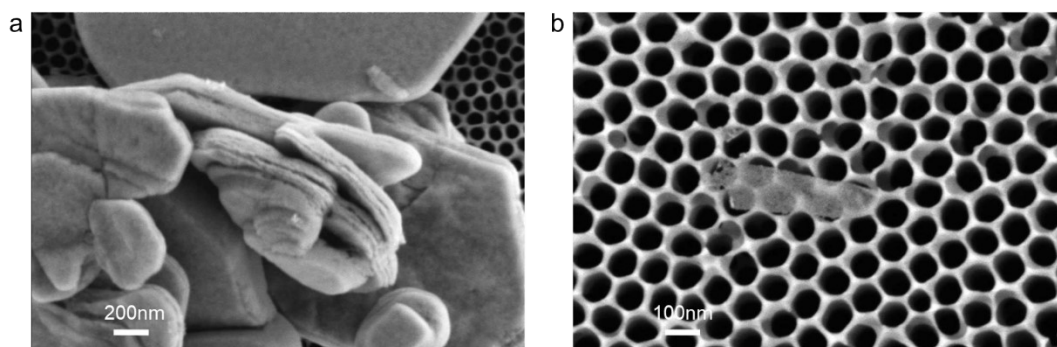

**Figure S1.** SEM image of (a) multilayer Mo<sub>2</sub>C and (b) monolayer Mo<sub>2</sub>C.

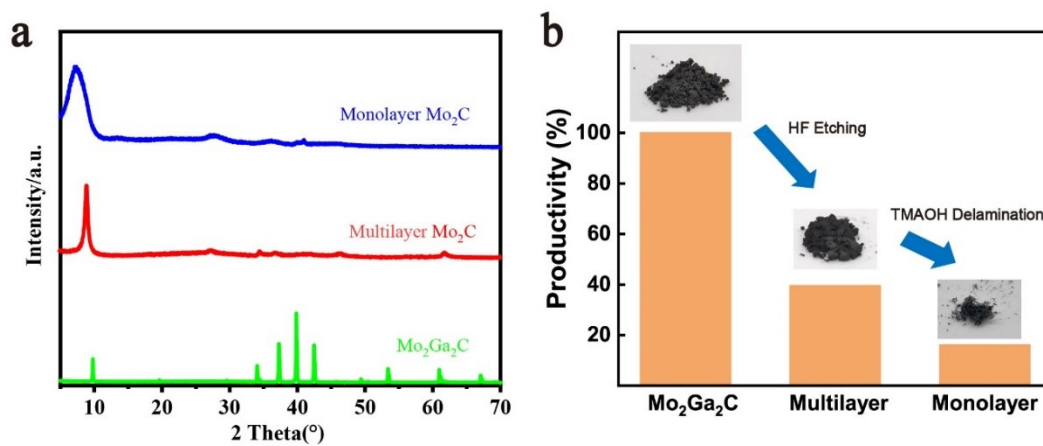

**Figure S2.** (a) X-ray diffraction spectra of multilayer and monolayer Mo<sub>2</sub>C. (b) Productivity of multilayer and monolayer Mo<sub>2</sub>C. Insets: Photographs of the Mo<sub>2</sub>Ga<sub>2</sub>C, multilayer Mo<sub>2</sub>C, and monolayer Mo<sub>2</sub>C powders.

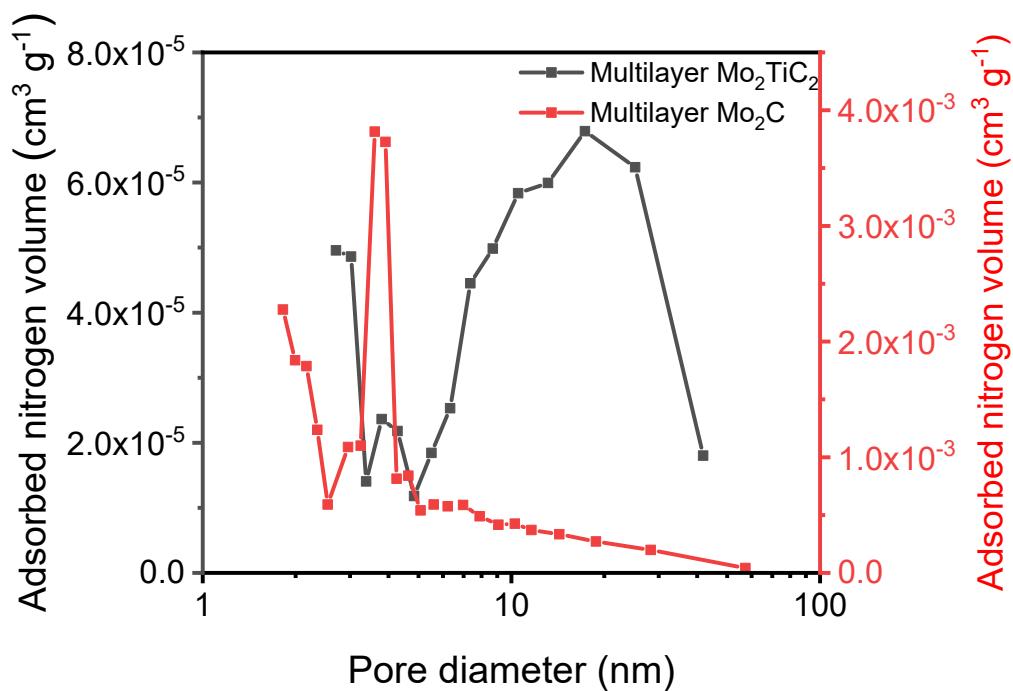

**Figure S3.** The average pore diameter of multilayer Mo<sub>2</sub>TiC<sub>2</sub> and monolayer Mo<sub>2</sub>TiC<sub>2</sub>.

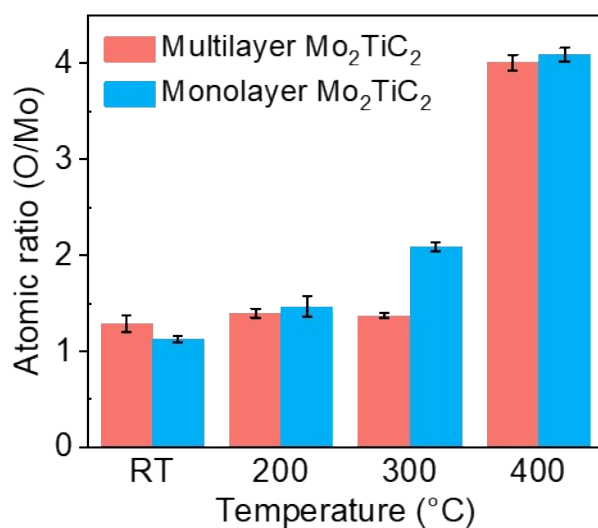

**Figure S4.** The oxygen-molybdenum content ratio of Mo<sub>2</sub>TiC<sub>2</sub> at different annealing temperatures in air atmosphere for 1h.

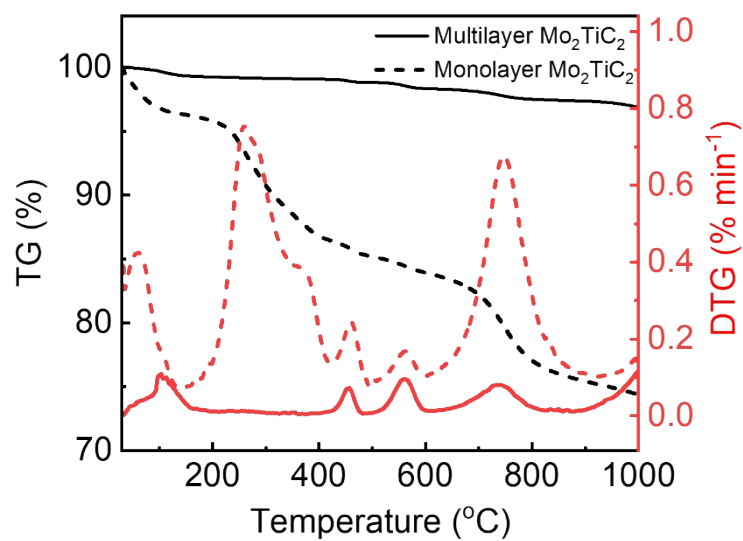

**Figure S5.** TG and DTG curves of the multilayer and monolayer  $\text{Mo}_2\text{TiC}_2$ .

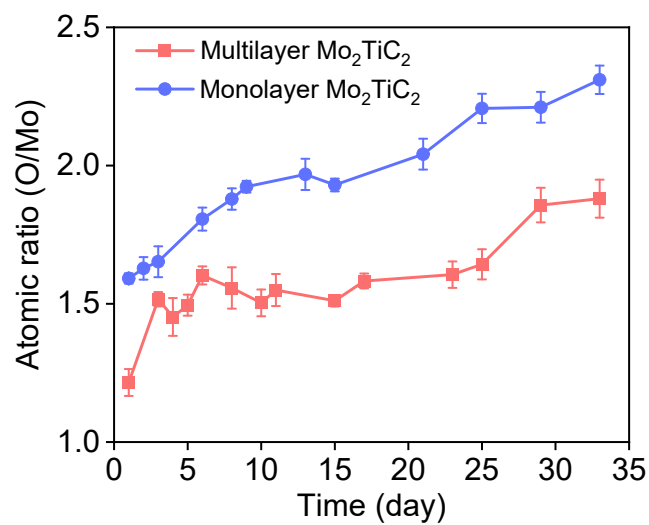

**Figure S6.** Changes in oxygen-molybdenum content ratio of multilayer and monolayer  $\text{Mo}_2\text{TiC}_2$  with storage time under environmental conditions (temperature: 25 °C, humidity: 40%).

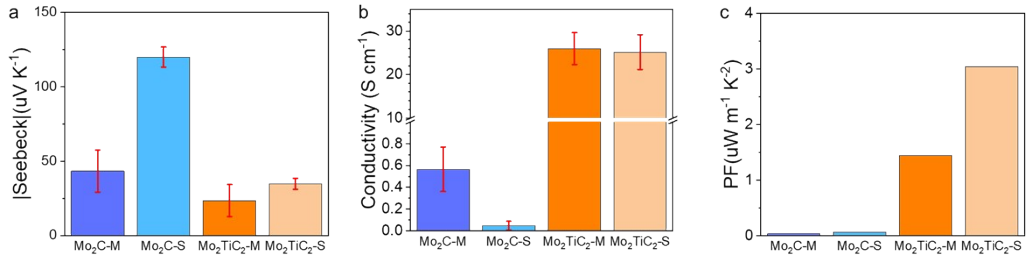

**Figure S7.** (a) Seebeck coefficients, (b) conductivity and (c) power factor of multilayer Mo<sub>2</sub>C and Mo<sub>2</sub>TiC<sub>2</sub>, monolayer Mo<sub>2</sub>C and Mo<sub>2</sub>TiC<sub>2</sub> at room temperature.

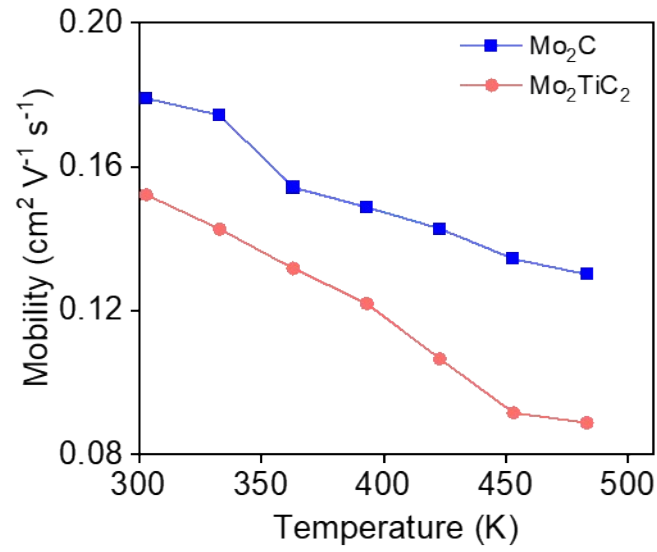

**Figure S8.** The carrier mobility of the multilayer Mo<sub>2</sub>TiC<sub>2</sub> and Mo<sub>2</sub>C as a function of temperature.

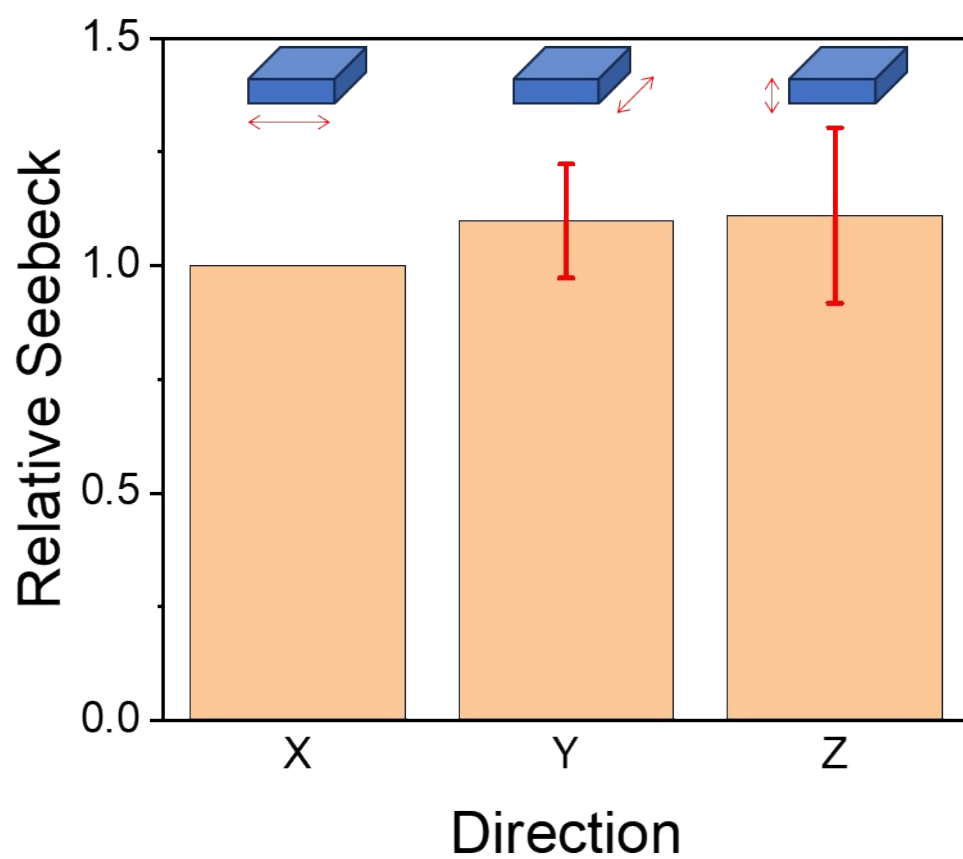

**Figure S9.** Relative Seebeck coefficients in different directions in block multilayer MXene.
